# Supplementary material for: Water and nitrogen conditions affect the relationships of Δ13C and Δ18O to gas exchange and growth in durum wheat
Source: PubMed Central journal article supplement — J Exp Bot. 2009 Feb 26;60(6):1633–44. doi: 10.1093/jxb/erp028 (PMC2671614; doi:10.1093/jxb/erp028), 2009-02-26
Supplement: erp028_1.pdf [file erp028_1.pdf]

1 **Water and nitrogen conditions affect the relationships of  $\Delta^{13}\text{C}$  and  $\Delta^{18}\text{O}$  with gas**  
2 **exchange and growth in durum wheat**

3 *Llorenç Cabrera-Bosquet, Gemma Molero, Salvador Nogués, and Jose Luis Araus*

4  
5 **Supplementary Material**

6  
7  
8 **Figure S1.** Relationship between measured and predicted  $\Delta^{18}\text{O}_s$  values in plants grown  
9 under high N. A simplified Péclet model developed by Barbour and coworkers  
10 (<http://www.ecophys.biology.utah.edu/>) was used to predict  $\Delta^{18}\text{O}_s$  values. Several  
11 parameters such as the diffusion fractionation through stomata (32‰) and the boundary  
12 layer (21‰), the equilibrium fractionation between C=O and water for carbonyl  
13 exchange (27‰) and for the whole leaf biomass (8‰),  $p_{ex}:p_x = 0.38$  and the effective  
14 length for Péclet effect (8mm) were assumed (Barbour and Farquhar, 2000; Barbour *et*  
15 *al.*, 2000a). The  $\delta^{18}\text{O}$  of source water, the RH, and the leaf and air temperatures,  
16 stomatal and boundary layer conductance and  $E$  rates measured in our experiment were  
17 entered to the model and used for the calculation. Each point represents the high N  
18 treatment means for each genotype and water conditions. Each value is the mean of four  
19 replicates. The dashed line represents a slope of 1. Measured  $\Delta^{18}\text{O}_s = -3.6 + 1.1\text{predicted}$   
20  $\Delta^{18}\text{O}_s$ ;  $R=0.69$ .

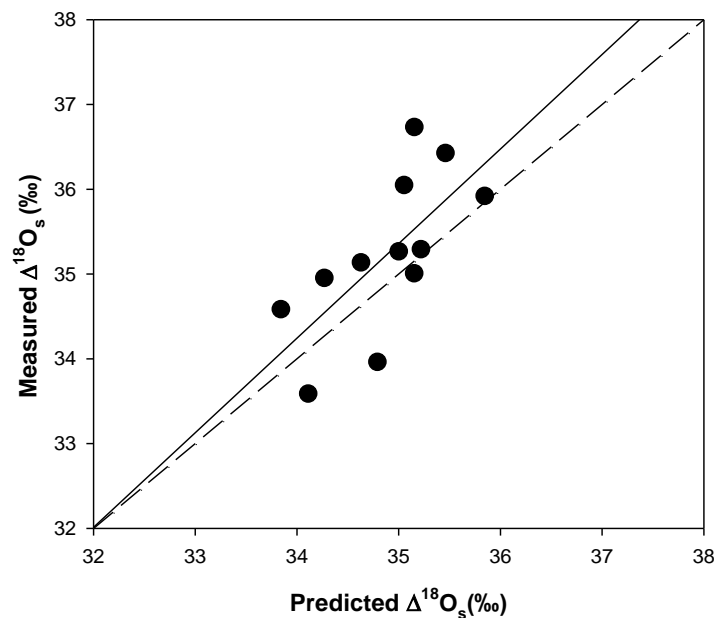

22

23
